# Supplementary material for: Synthesis of hierarchical three-dimensional copper oxide nanostructures through a biomineralization-inspired approach
Source: Royal Society of Chemistry journal article supplement (doi:10.1039/c3nr01872e), 2013-01-01
Supplement: c3nr01872e.pdf [file c3nr01872e.pdf]

# Synthesis of Hierarchical Three-Dimensional Copper Oxide Nanostructures through a Biomineralization-Inspired Approach

Xiang Fei, Zhengzhong Shao, Xin Chen\*

*State Key Laboratory of Molecular Engineering of Polymers, Department of Macromolecular Science, Laboratory of Advanced Materials, Fudan University, Shanghai, 200433, People's Republic of China*

\*Corresponding author. Tel.: +86-21-6564-2866. Fax: +86-21-5163-0300

E-mail address: chenx@fudan.edu.cn

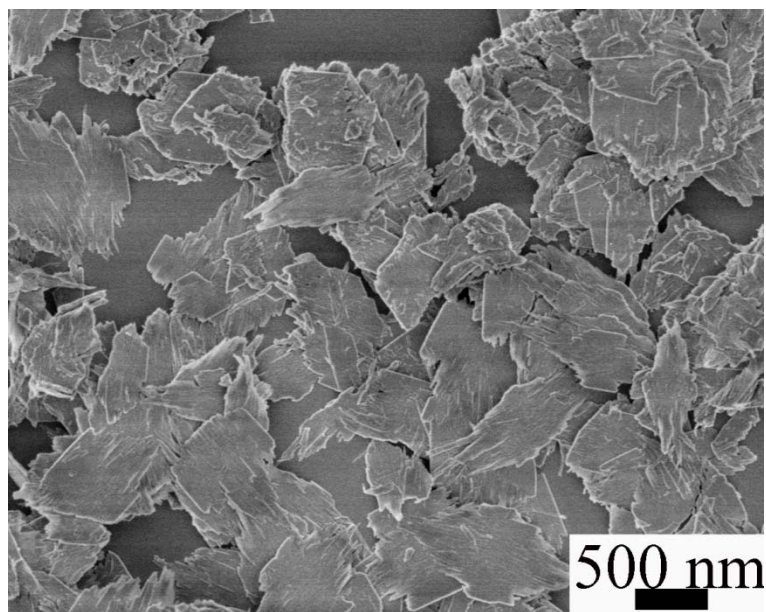

**Fig. S1** SEM image of the synthesized CuO obtained without silk fibroin.

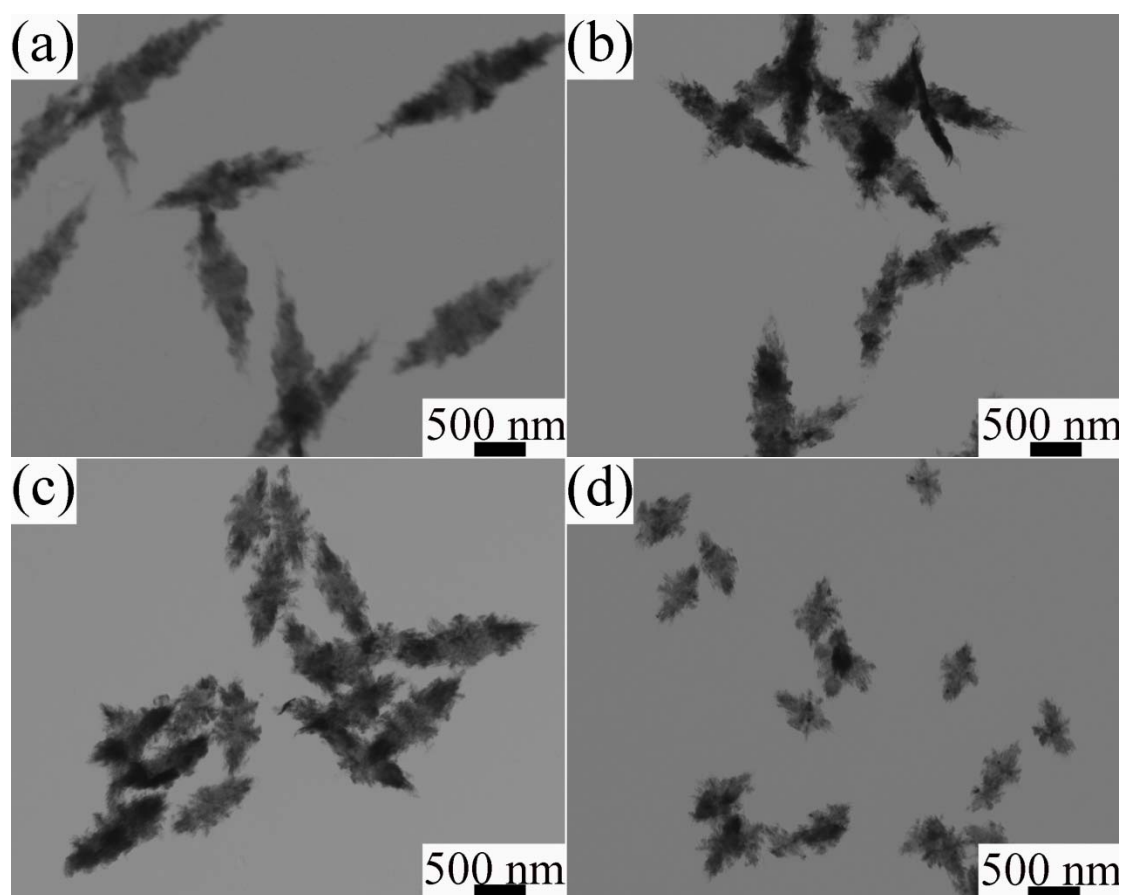

**Fig. S2** TEM images of the synthesized CuO nanostructures obtained with different silk fibroin concentration. (a) [RSF] = 0.01 wt%, (b) [RSF] = 0.05 wt%, (c) [RSF] = 0.1 wt%, (d) [RSF] = 0.2 wt%.
